# Supplementary material for: Aorto-Iliac Artery Calcification Prior to Kidney Transplantation
Source: PubMed Central journal article supplement (PMC7563260; doi:10.3390/jcm9092893), 2020-09-07
Supplement: jcm-09-02893-s001.pdf [file jcm-09-02893-s001.pdf]

## Aorto-Iliac Artery Calcification Prior to Kidney Transplantation

Stan Benjamens <sup>1,2\*</sup>, Elsaline Rijkse <sup>3</sup>, Charlotte A. te Velde-Keyzer <sup>4</sup>, Stefan P. Berger <sup>4</sup>, Cyril Moers <sup>1</sup>,

Martin H. de Borst <sup>4</sup>, Derya Yakar <sup>2</sup>, Riemer H. J. A. Slart <sup>2,5</sup>, Frank J. M. F. Dor <sup>6,7</sup>, Robert C. Minnee <sup>3</sup> and Robert A. Pol <sup>1</sup>

<sup>1</sup>Department of Surgery, Division of Transplant Surgery, University of Groningen, University Medical Center Groningen, Groningen, The Netherlands; c.moers@umcg.nl (C.M.); r.pol@umcg.nl (R.A.P.)

<sup>2</sup>Medical Imaging Center, Department of Nuclear Medicine and Molecular Imaging & Department of Radiology, University of Groningen, University Medical Center Groningen, Groningen, The Netherlands; d.yakar@umcg.nl (D.Y.); r.h.j.a.slart@umcg.nl (R.H.J.A.S.)

<sup>3</sup>Department of Surgery, Division of HPB and Transplant Surgery, Erasmus MC University Medical Center, Rotterdam, The Netherlands; a.rijkse@erasmusmc.nl (E.R.); r.minnee@erasmusmc.nl (R.B.M.)

<sup>4</sup>Department of Internal Medicine, Division of Nephrology, University of Groningen, University Medical Center Groningen, Groningen, The Netherlands; c.a.keyzer@umcg.nl (C.A.t.V.K.); s.p.berger@umcg.nl (S.P.B.); m.h.de.borst@umcg.nl (M.H.d.B)

<sup>5</sup>Department of Biomedical Photonic Imaging, Faculty of Science and Technology, University of Twente, Enschede, The Netherlands.

<sup>6</sup>Imperial College Renal and Transplant Centre, Hammersmith Hospital, Imperial College Healthcare NHS Trust, London, United Kingdom; frank.dor@nhs.net (F.J.M.F.D.)

<sup>7</sup>Department of Surgery & Cancer, Imperial College, London, United Kingdom

\* Correspondence: s.benjamens@umcg.nl (S.B.)

**Table 1.** Univariable associations with all-cause mortality.

| <b>Covariables</b>                   | <b>Hazard ratio</b> | <b>95% CI</b> | <b><i>p</i>-value</b> |
|--------------------------------------|---------------------|---------------|-----------------------|
| CaScore (stratified)                 |                     |               |                       |
| Low                                  | Ref.                | Ref.          |                       |
| Medium                               | 2.12                | 1.08-4.15     | <b>0.029</b>          |
| High                                 | 5.24                | 2.85-9.63     | <b>&lt;0.0001</b>     |
| CaScore (continuous)                 | 2.02                | 1.60-2.56     | <b>&lt;0.0001</b>     |
| Female gender                        | 0.96                | 0.61-1.51     | 0.855                 |
| Age                                  | 1.06                | 1.03-1.08     | <b>&lt;0.0001</b>     |
| Diabetes mellitus                    | 2.23                | 1.43-3.49     | <b>&lt;0.001</b>      |
| Body Mass Index                      | 1.01                | 0.96-1.06     | 0.713                 |
| Smoker                               |                     |               |                       |
| Non                                  | Ref.                | Ref.          |                       |
| Former                               | 1.21                | 0.71-2.05     | 0.489                 |
| Current                              | 2.27                | 1.26-4.08     | <b>0.006</b>          |
| Total cholesterol                    | 1.18                | 1.00-1.39     | 0.052                 |
| Hypercholesterolemia                 | 1.45                | 0.92-2.27     | 0.108                 |
| Systolic blood pressure              | 1.01                | 1.00-1.02     | 0.057                 |
| Diastolic blood pressure             | 0.98                | 0.97-1.00     | <b>0.033</b>          |
| Use of antihypertensive medication   | 1.97                | 0.99-3.95     | 0.055                 |
| Type of dialysis                     |                     |               |                       |
| Pre-emptive                          | Ref.                | Ref.          |                       |
| Hemodialysis                         | 2.94                | 1.59-5.42     | <b>&lt;0.001</b>      |
| Peritoneal dialysis                  | 2.19                | 1.07-4.48     | <b>0.032</b>          |
| Dialysis vintage pre-transplantation | 1.34                | 1.15-1.56     | <b>&lt;0.001</b>      |
| History of MI                        | 1.76                | 1.04-2.98     | <b>0.035</b>          |
| History of CVA                       | 1.65                | 0.80-3.44     | 0.177                 |
| History of TIA                       | 0.33                | 0.05-2.40     | 0.276                 |
| History of PAD                       | 2.55                | 1.53-4.24     | <b>&lt;0.001</b>      |
| Charlson Comorbidity Index           | 1.25                | 1.16-1.35     | <b>&lt;0.0001</b>     |
| Framingham score                     | 1.86                | 1.43-2.42     | <b>&lt;0.0001</b>     |

Aorto-iliac calcium score = CaScore; hazard ratio, 95% confidence interval (95% CI), and *p*-value by Cox proportional hazards regression analysis; MI = myocardial infarction; CVA = cerebrovascular accident; TIA = transient ischemic attack; PAD = new onset peripheral artery disease.

**Table S2.** Univariable Cox regression analysis for cardiovascular mortality.

| <b>Covariables</b>                   | <b>Hazard ratio</b> | <b>95% CI</b> | <b><i>p</i>-value</b> |
|--------------------------------------|---------------------|---------------|-----------------------|
| CaScore                              |                     |               |                       |
| Low                                  | Ref.                | Ref.          |                       |
| Medium                               | 3.42                | 1.07-10.91    | <b>0.038</b>          |
| High                                 | 7.86                | 2.63-23.47    | <b>&lt;0.001</b>      |
| CaScore (continuous)                 | 2.27                | 1.55-3.34     | <b>&lt;0.0001</b>     |
| Female gender                        | 1.16                | 0.57-2.36     | 0.672                 |
| Age                                  | 1.07                | 1.03-1.11     | <b>&lt;.001</b>       |
| Diabetes mellitus                    | 2.42                | 1.20-4.90     | <b>0.014</b>          |
| Body Mass Index                      | 1.03                | 0.96-1.11     | 0.361                 |
| Smoker                               |                     |               |                       |
| Non                                  | Ref.                | Ref.          |                       |
| Former                               | 4.03                | 1.38-11.45    | <b>0.011</b>          |
| Current                              | 2.80                | 0.82-9.57     | .102                  |
| Total cholesterol                    | 1.41                | 1.11-1.79     | <b>0.005</b>          |
| Hypercholesterolemia                 | 1.79                | 0.89-3.60     | 0.103                 |
| Systolic blood pressure              | 1.00                | 0.99-1.02     | 0.955                 |
| Diastolic blood pressure             | 0.97                | 0.94-0.99     | <b>0.014</b>          |
| Use of antihypertensive medication   | 3.76                | 0.90-15.70    | 0.070                 |
| Type of dialysis                     |                     |               |                       |
| Pre-emptive                          | Ref.                | Ref.          |                       |
| Hemodialysis                         | 0.94                | 0.41-2.18     | 0.894                 |
| Peritoneal dialysis                  | 2.17                | 0.90-5.25     | 0.086                 |
| Dialysis vintage pre-transplantation | 1.47                | 1.13-1.90     | <b>0.004</b>          |
| History of MI                        | 2.83                | 1.33-5.98     | <b>0.007</b>          |
| History of CVA                       | 1.00                | 0.24-4.21     | 0.996                 |
| History of TIA                       | 0.87                | 0.12-6.35     | 0.887                 |
| History of PAD                       | 2.57                | 1.15-5.75     | <b>0.021</b>          |
| Charlson Comorbidity Index           | 1.23                | 1.08-1.40     | <b>0.002</b>          |
| Framingham score                     | 1.93                | 1.26-2.96     | <b>0.002</b>          |

Aorto-iliac calcium score = CaScore; hazard ratio, 95% confidence interval (95% CI), and *p*-value by Cox proportional hazards regression analysis; MI = myocardial infarction; CVA = cerebrovascular accident; TIA = transient ischemic attack; PAD = new onset peripheral artery disease.

**Table S3.** Univariable Cox regression analysis for cardiovascular events.

| Covariables                          | Hazard ratio | 95% CI    | <i>p</i> -value   |
|--------------------------------------|--------------|-----------|-------------------|
| CaScore                              |              |           |                   |
| Low                                  | Ref.         | Ref.      |                   |
| Medium                               | 2.13         | 1.19-3.84 | <b>0.011</b>      |
| High                                 | 2.86         | 1.62-5.08 | <b>&lt;0.001</b>  |
| CaScore (continuous)                 | 1.56         | 1.25-1.95 | <b>&lt;0.0001</b> |
| Female gender                        | 0.93         | 0.60-1.45 | 0.757             |
| Age                                  | 1.04         | 1.02-1.06 | <b>&lt;0.001</b>  |
| Diabetes mellitus                    | 1.94         | 1.26-3.01 | <b>0.003</b>      |
| Body Mass Index                      | 1.06         | 1.01-1.10 | <b>0.014</b>      |
| Smoker                               |              |           |                   |
| Non                                  | Ref.         | Ref.      |                   |
| Former                               | 1.03         | 0.64-1.67 | 0.890             |
| Current                              | 1.02         | 0.49-1.97 | 0.962             |
| Total cholesterol                    | 1.11         | 0.94-1.31 | 0.214             |
| Hypercholesterolemia                 | 2.66         | 1.73-4.10 | <b>&lt;0.0001</b> |
| Systolic blood pressure              | 1.01         | 1.00-1.02 | 0.162             |
| Diastolic blood pressure             | 0.98         | 0.97-1.00 | 0.057             |
| Use of antihypertensive medication   | 1.34         | 0.74-2.42 | 0.337             |
| Type of dialysis                     |              |           |                   |
| Pre-emptive                          | Ref.         | Ref.      |                   |
| Hemodialysis                         | 2.95         | 1.64-5.33 | <b>&lt;0.001</b>  |
| Peritoneal dialysis                  | 2.17         | 1.08-4.38 | <b>0.030</b>      |
| Dialysis vintage pre-transplantation | 1.31         | 1.13-1.51 | <b>&lt;0.001</b>  |
| History of MI                        | 3.39         | 2.15-5.37 | <b>&lt;0.0001</b> |
| History of CVA                       | 1.94         | 1.00-3.77 | <b>0.049</b>      |
| History of TIA                       | 1.98         | 0.86-4.56 | 0.107             |
| History of PAD                       | 1.21         | 0.66-2.24 | 0.536             |
| Charlson Comorbidity Index           | 1.16         | 1.07-1.26 | <b>&lt;0.001</b>  |
| Framingham score                     | 1.54         | 1.21-1.96 | <b>&lt;0.001</b>  |

Aorto-iliac calcium score = CaScore; hazard ratio, 95% confidence interval (95% CI), and *p*-value by Cox proportional hazards regression analysis; MI = myocardial infarction; CVA = cerebrovascular accident; TIA = transient ischemic attack; PAD = new onset peripheral artery disease.

**Table S4.** Discriminative capacity of the CaScore for risk prediction.

|                                         | <b>C-statistics</b> | <b>95% CI</b> | <b>Change</b> | <b>95% CI</b> | <b>p-value</b> | <b>IDI (%)</b> | <b>p-value</b>    |
|-----------------------------------------|---------------------|---------------|---------------|---------------|----------------|----------------|-------------------|
| <b>All-cause mortality</b>              |                     |               |               |               |                |                |                   |
| CaScore                                 | 0.66                | 0.59-0.72     | -             | -             | -              | -              | -                 |
| Age and gender                          | 0.67                | 0.57-0.76     | Ref           | -             | -              | Ref            | -                 |
| Age and gender<br>+ CaScore             | 0.74                | 0.65-0.83     | 0.07          | 0.01-0.14     | <b>.042</b>    | 4.1            | <b>&lt;0.0001</b> |
| Charlson Comorbidity Index              | 0.71                | 0.64-0.78     | Ref           | -             | -              | Ref            | -                 |
| Charlson Comorbidity Index<br>+ CaScore | 0.75                | 0.67-0.83     | 0.04          | -0.01-0.10    | .131           | 4.2            | <b>&lt;0.0001</b> |
| Framingham score                        | 0.72                | 0.65-0.79     | Ref           | -             | -              | Ref            | -                 |
| Framingham score<br>+ CaScore           | 0.76                | 0.69-0.83     | 0.04          | -0.04-0.13    | .305           | 2.5            | <b>&lt;0.001</b>  |
| <b>Cardiovascular mortality</b>         |                     |               |               |               |                |                |                   |
| CaScore                                 | 0.72                | 0.63-0.81     | -             | -             | -              | -              | -                 |
| Age and gender                          | 0.66                | 0.56-0.75     | Ref           | -             | -              | Ref            | -                 |
| Age and gender<br>+ CaScore             | 0.71                | 0.62-0.81     | 0.06          | -0.01-0.12    | .080           | 1.5            | <b>0.025</b>      |
| Charlson Comorbidity Index              | 0.70                | 0.63-0.78     | Ref           | -             | -              | Ref            | -                 |
| Charlson Comorbidity Index<br>+ CaScore | 0.73                | 0.65-0.81     | 0.03          | -0.07-0.13    | .594           | 2.2            | <b>0.002</b>      |
| Framingham score                        | 0.66                | 0.75-0.75     | Ref           | -             | -              | Ref            | -                 |
| Framingham score<br>+ CaScore           | 0.72                | 0.65-0.80     | 0.06          | -0.04-0.17    | .229           | 1.1            | <b>0.033</b>      |
| <b>Cardiovascular events</b>            |                     |               |               |               |                |                |                   |
| CaScore                                 | 0.58                | 0.52-0.64     | -             | -             | -              | -              | -                 |
| Age and gender                          | 0.58                | 0.52-0.65     | Ref           | -             | -              | Ref            | -                 |
| Age and gender<br>+ CaScore             | 0.58                | 0.53-0.64     | 0.01          | -0.04-0.05    | .834           | 1.2            | <b>0.016</b>      |
| Charlson Comorbidity Index              | 0.61                | 0.55-0.67     | Ref           | -             | -              | Ref            | -                 |
| Charlson Comorbidity Index<br>+ CaScore | 0.62                | 0.57-0.69     | 0.02          | -0.03-0.06    | .491           | 1.1            | <b>0.021</b>      |
| Framingham score                        | 0.59                | 0.53-0.65     | Ref           | -             | -              | Ref            | -                 |
| Framingham score<br>+ CaScore           | 0.59                | 0.53-0.65     | 0.00          | -0.04-0.04    | .949           | 0.5            | 0.129             |

Aorto-iliac calcium score = CaScore; data are presented as Harrell's concordance index (C-statistic) with 95% confidence interval (CI). Change in C-statistics and Integrated discrimination improvement (IDI) compared to model excluding CaScore, with corresponding *p*-values.
